# Supplementary material for: Differential Immune Infiltration Profiles in Colitis-Associated Colorectal Cancer versus Sporadic Colorectal Cancer
Source: MDPI journal article supplement (doi:10.3390/cancers15194743), 2023-09-27
Supplement: s1 [file s1]

## Supplementary Material

### Supplementary Figures

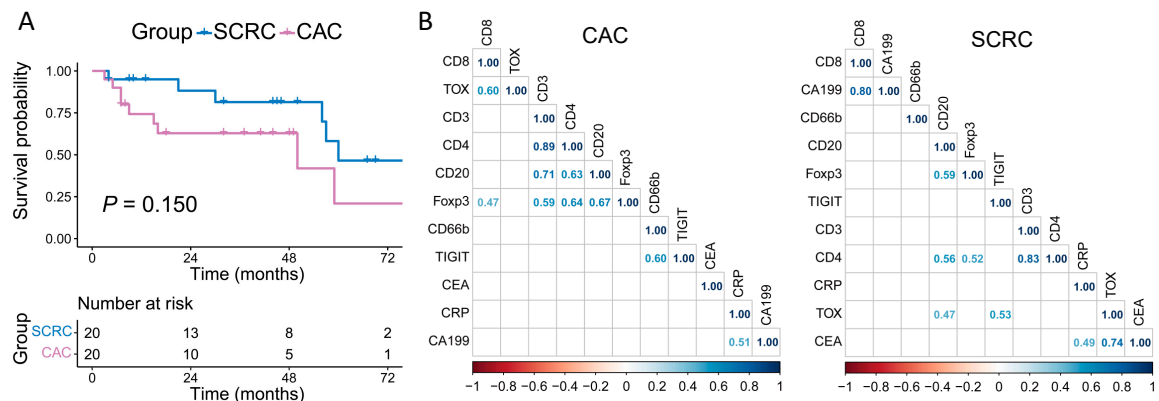

**Supplementary Figure S1** (A) To compare the overall survival between sCRC and CAC patients, the Log-rank test was employed. (B) A correlation analysis was conducted using the Pearson correlation to assess the relationship between immune infiltrations and clinical test parameters in both CAC and sCRC patients. The resulting correlation coefficients ( $r$ ) were depicted, while blank entries represent cases where the associated p-value exceeded 0.05, indicating a lack of significant correlation. Abbreviations: CAC, colitis-associated colorectal cancer; SCRC, sporadic colorectal cancer;

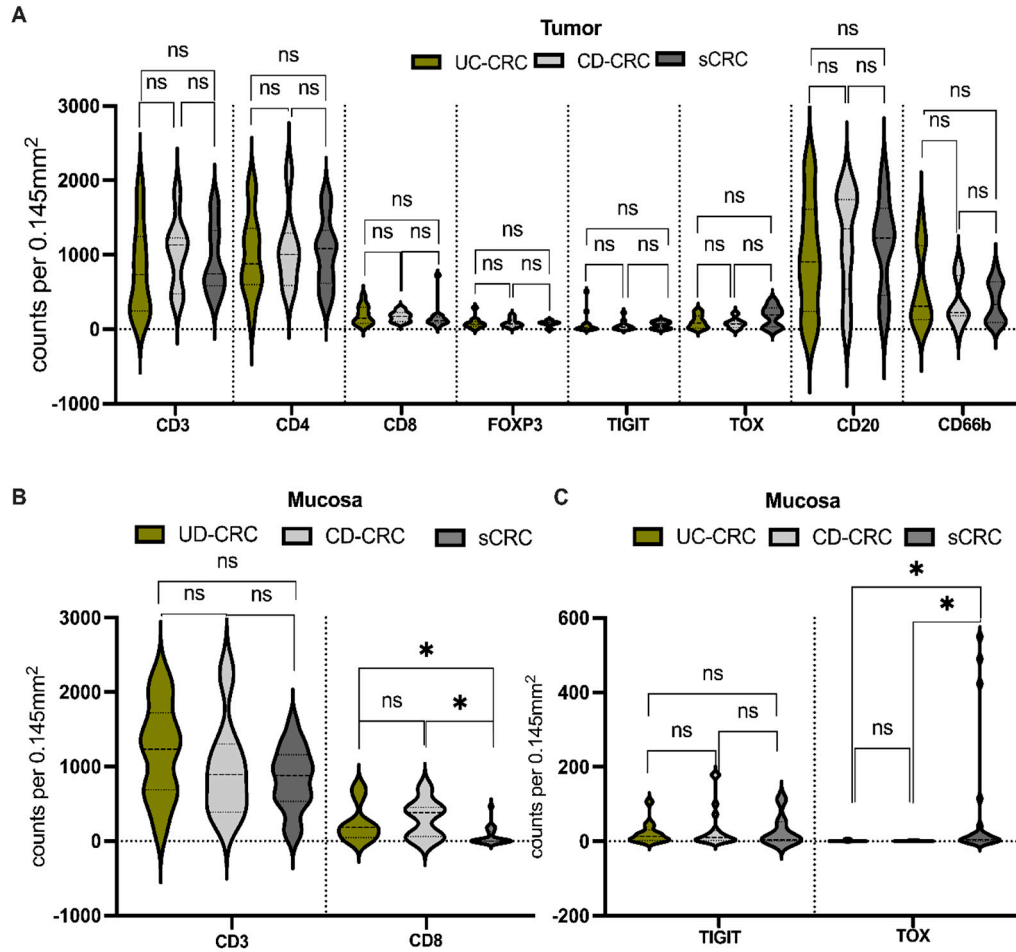

**Supplementary Figure S2** Comparing the immune cell composition between ulcerative colitis associated (UC)-CRC, Crohn's disease associated (CD)-CRC and sporadic (s)CRC in the tumor tissue (A) with violin plots demonstrating the tumor infiltration levels of 8 immune markers in UC-CRC (n = 13), CD-CRC (n = 7), and sCRC (n = 20). In tumor-free mucosa, CD3+ and CD8+ infiltrates (B) were compared among the above groups, TIGIT+ and TOX+ cell-counts (C) in the tumor-free mucosa were compared among the above groups. Multiple comparisons test was used to correct the P value of the comparison of the markers between UC-CRC, CD-CRC and sCRC (ns;  $P \geq 0.05$ ;  $P < 0.05$ , \*\*  $P < 0.01$ , \*\*\*  $P < 0.001$ , ns=not significant).

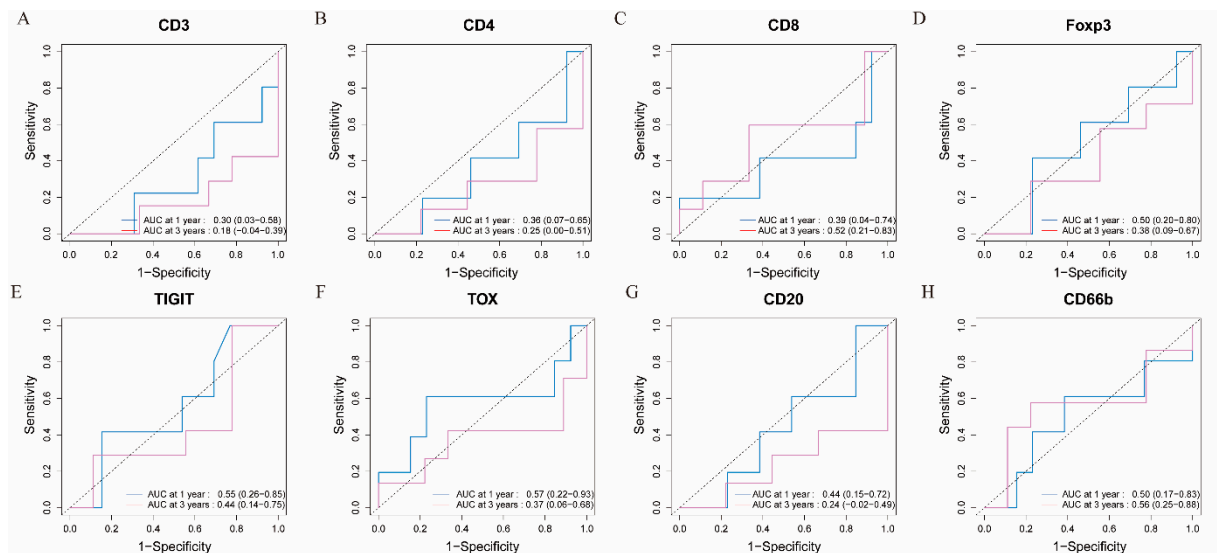

**Supplementary Figure S3** displays Receiver Operating Characteristic (ROC) plots, which are used to assess the predictive capability of various immune infiltrations for overall survival (OS) in CAC patients. The ROC plots provide a visual representation of the performance of these immune infiltrations as prognostic factors for OS in CAC.

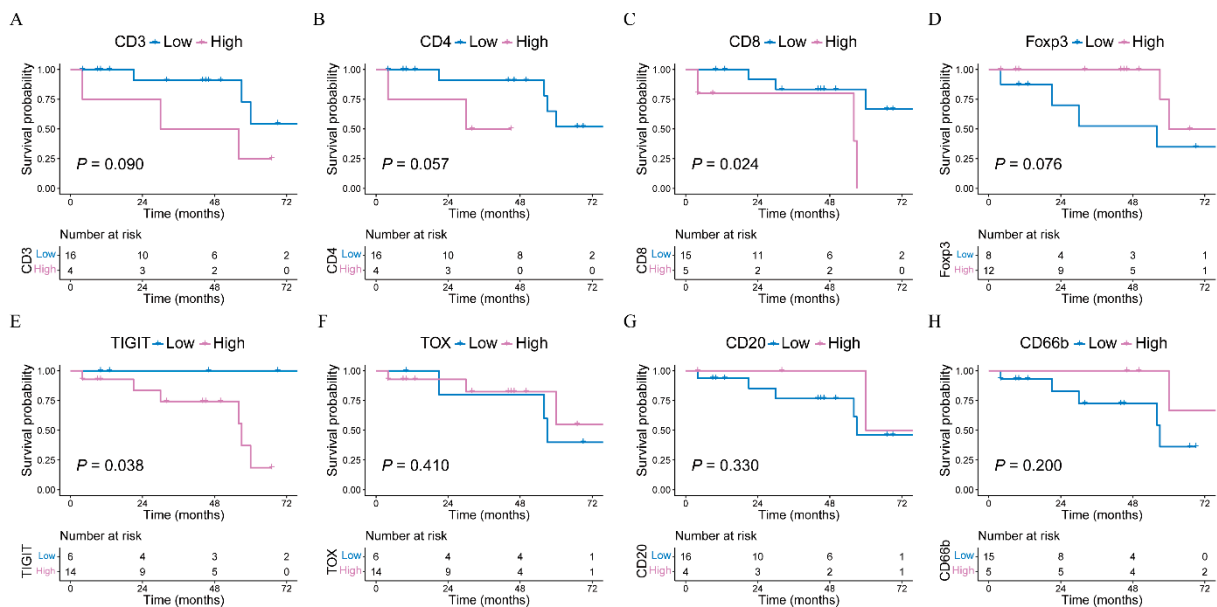

**Supplementary Figure S4** A prognostic analysis of immune infiltrations in sporadic Colorectal Cancer (sCRC) patients after using the Survmirer R package to select the best cut-off point for classifying the patient cohort into high or low-infiltration groups.

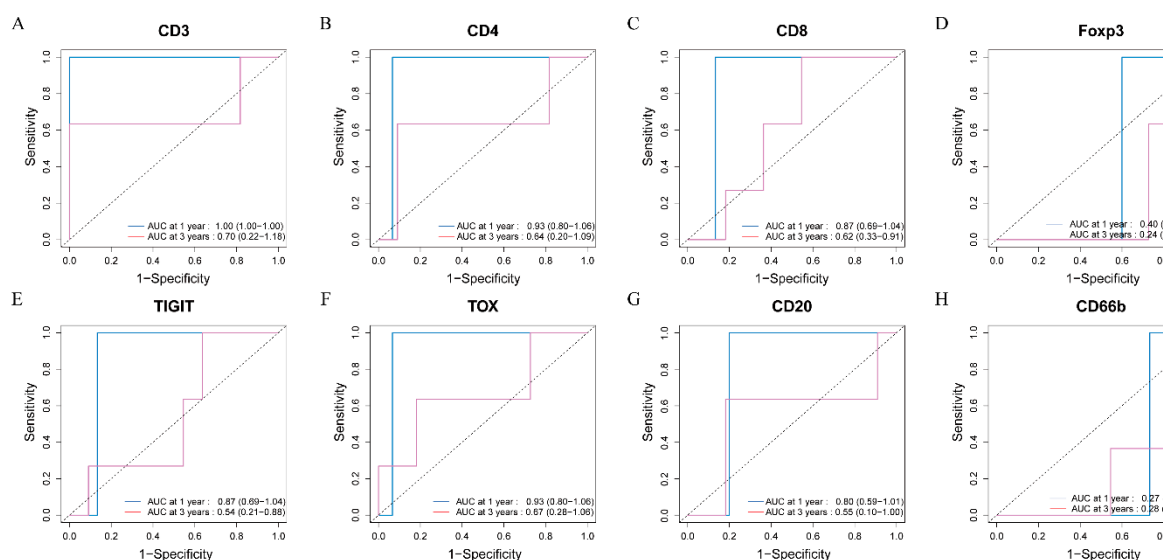

**Supplementary Figure S5** displays Receiver Operating Characteristic (ROC) plots, which are used to assess the predictive capability of various immune infiltrations for overall survival (OS) in sCRC patients. The ROC plots provide a visual representation of the performance of these immune infiltrations as prognostic factors for OS in sCRC.

## Supplementary Tables

| Antibodies             | Dilution | Catalogue number | Company       | City                      | Country |
|------------------------|----------|------------------|---------------|---------------------------|---------|
| <b>Markers</b>         |          |                  |               |                           |         |
| CD3                    | 1:100    | Ab5690           | Abcam         | Cambridge                 | UK      |
| CD4                    | 1:600    | Ab133616         | Abcam         | Cambridge                 | UK      |
| CD8                    | 1:100    | Ab17147          | Abcam         | Cambridge                 | UK      |
| Foxp3                  | 1:400    | Ab20034          | Abcam         | Cambridge                 | UK      |
| TIGIT                  | 1:600    | Ab243903         | Abcam         | Cambridge                 | UK      |
| TOX                    | 1:200    | HPA018322        | Sigma-Aldrich | Burlington, Massachusetts | USA     |
| CD20                   | 1:400    | Ab78237          | Abcam         | Cambridge                 | UK      |
| CD66b                  | 1:400    | 305102           | Biolegend     | San Diego, California     | USA     |
| <b>Isotype Control</b> |          |                  |               |                           |         |
| IgG                    | —        | Ab37415          | Abcam         | Cambridge                 | UK      |
| IgG1, κ                | —        | Ab91353          | Abcam         | Cambridge                 | UK      |
| IgM, κ                 | —        | 401601           | Biolegend     | San Diego, California     | USA     |

**Supplementary Table S1.** The detailed information of the primary antibodies applied in immunohistochemistry staining.

Abbreviations: FOXP3, Forkhead box P3; TIGIT, T cell immunoreceptor with immunoglobulin and ITIM domain; TOX, thymocyte selection-associated HMG BOX; UK, United Kingdom; USA, United States of America.

| Variables | CAC     | sCRC    |
|-----------|---------|---------|
| CD3       | 273.00  | 1280.67 |
| CD4       | 1058.00 | 1338.33 |
| CD8       | 108.67  | 170.00  |
| Foxp3     | 84.00   | 73.67   |
| TIGIT     | 39.67   | 8.00    |
| TOX       | 115.00  | 60.33   |
| CD20      | 149.33  | 1751.33 |
| CD66b     | 723.67  | 591.00  |

**Supplementary Table S2:** Demonstrates the counting threshold values for classifying a population as having a "high" level of marker expression as defined using the Survminer R package to select the best cut-off counts (in Figure 5 and Suppl. Figure S4).
